# Supplementary material for: Influenza Vaccine Effectiveness in Preventing Influenza A(H3N2)-Related Hospitalizations in Adults Targeted for Vaccination by Type of Vaccine: A Hospital-Based Test-Negative Study, 2011–2012 A(H3N2) Predominant Influenza Season, Valencia, Spain
Source: PubMed Central journal article supplement (PMC4230985; doi:10.1371/journal.pone.0112294), 2014-11-13

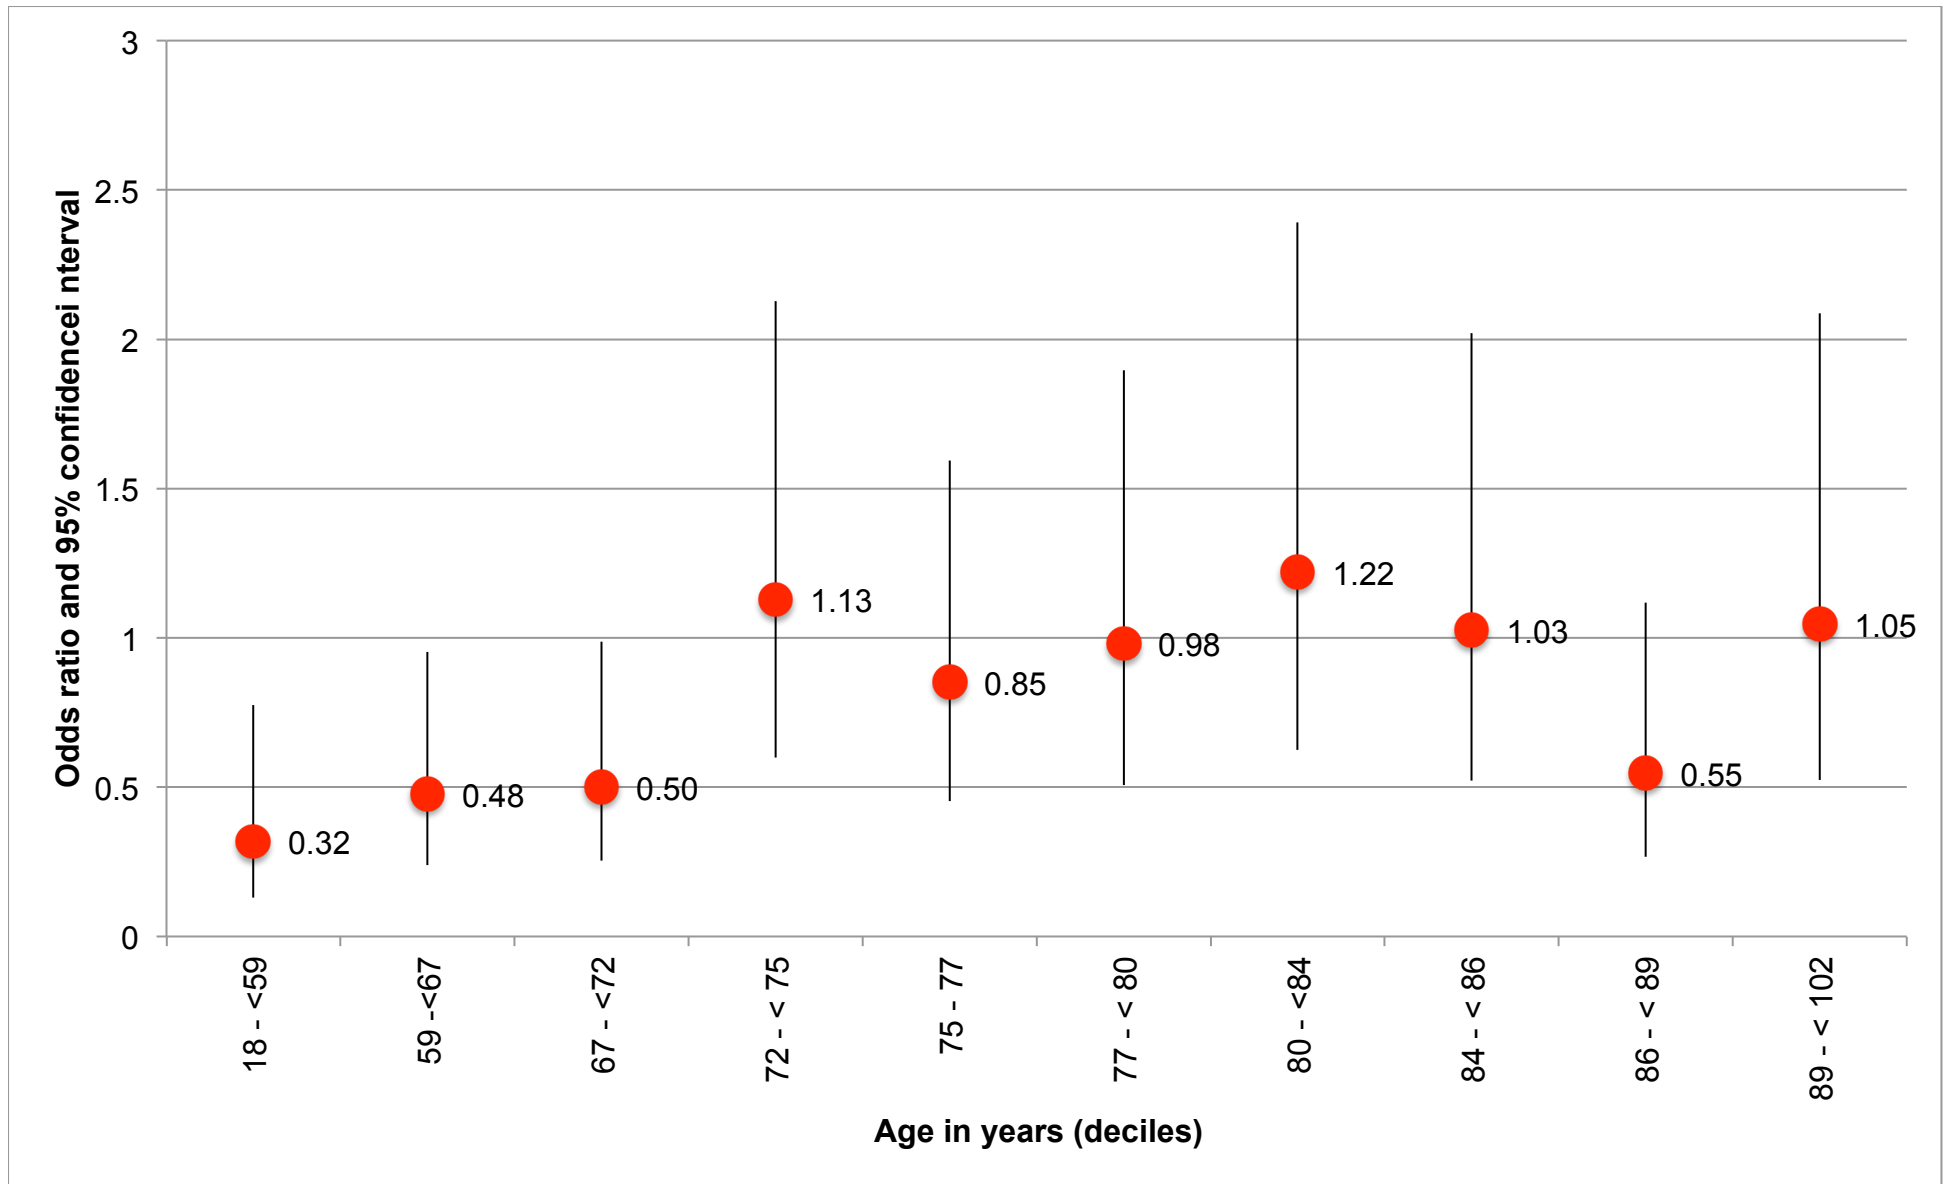

Supplement: pone.0112294.s002.pdf [file pone.0112294.s002.pdf]
