# Supplementary material for: Influenza Vaccine Effectiveness in Preventing Influenza A(H3N2)-Related Hospitalizations in Adults Targeted for Vaccination by Type of Vaccine: A Hospital-Based Test-Negative Study, 2011–2012 A(H3N2) Predominant Influenza Season, Valencia, Spain
Source: PubMed Central journal article supplement (PMC4230985; doi:10.1371/journal.pone.0112294), 2014-11-13
Supplement: pone.0112294.s006.pdf [file pone.0112294.s006.pdf]

## Supporting Table S3

Puig-Barberà et al., Influenza vaccine effectiveness in preventing influenza A(H3N2)-related hospitalizations in adults targeted for vaccination by type of vaccine: a hospital-based test-negative study, 2011-2012 A(H3N2) predominant influenza season, Valencia, Spain, *PLoS One*, 2014

### Correspondence:

Dr. Joan Puig-Barberà,  
Vaccines Research Area,  
Fundación para el Fomento de la Investigación Sanitaria y Biomédica de la Comunitat Valenciana (FISABIO),  
Avenida Cataluña, 21 46020 Valencia, Spain.  
Phone: +34 961 925 948 Fax: +34 961 925 938  
E-mail: puig\_joa@gva.es

Table S3a Characteristics of unvaccinated and vaccinated subjects (i)

|                                | Unvaccinated | Vaccinated <sup>a</sup> | Crude odds ratio<br>(95% CI) | P-value<br>(LR test) |
|--------------------------------|--------------|-------------------------|------------------------------|----------------------|
|                                | Number (%)   | Number (%)              |                              |                      |
|                                | 745 (39)     | 1,169 (61)              |                              |                      |
| Age, mean in years (s.d.)      | 71.6 (14.8)  | 78.3 (10.2)             |                              | <0.0001              |
| Age group                      |              |                         |                              |                      |
| 18-49                          | 73 (84)      | 14 (16)                 | 1.0                          | <0.0001              |
| 50-64                          | 138 (55)     | 112 (45)                | 4.2 (2.3-7.9)                |                      |
| 65-74                          | 178 (44)     | 231 (56)                | 6.8 (3.7-12.4)               |                      |
| 75-79                          | 122 (33)     | 247 (67)                | 10.6 (5.7-19.5)              |                      |
| 80-84                          | 106 (31)     | 235 (69)                | 11.6 (6.2-21.4)              |                      |
| >=85                           | 128 (28)     | 330 (72)                | 13.4 (7.3-24.7)              |                      |
| Sex                            |              |                         |                              |                      |
| Male                           | 378 (35)     | 692 (65)                | 1.0                          | 0.0003               |
| Female                         | 367 (43)     | 477(57)                 | 0.7 (0.6-0.9)                |                      |
| High-risk conditions           |              |                         |                              |                      |
| None                           | 105 (45)     | 128 (55)                | 1.0                          | <0.0001              |
| One                            | 301 (45)     | 373 (55)                | 1.0 (0.8-1.4)                |                      |
| Two or more                    | 339 (34)     | 668 (66)                | 1.6 (1.2-2.2)                |                      |
| Body mass index                |              |                         |                              |                      |
| <18.5                          | 17 (57)      | 13 (43)                 | 0.5 (.2-1.1)                 |                      |
| 18.5 to 24.9                   | 230 (40)     | 347 (60)                | 1.0                          | 0.1684               |
| 25 to 29.9                     | 276 (37)     | 470 (63)                | 1.1 (0.9-1.1)                |                      |
| 30 to 39.9                     | 197 (39)     | 310 (61)                | 1.0 (0.8-1.3)                |                      |
| >=40                           | 25 (46)      | 29 (54)                 | 0.8 (0.4-1.3)                |                      |
| Smoking                        |              |                         |                              |                      |
| Never                          | 341 (39)     | 532 (61)                | 1.0                          | <0.0001              |
| Ex-smoker                      | 249 (31)     | 548 (69)                | 1.4 (1.2-1.7)                |                      |
| Current smoker                 | 155 (64)     | 89 (36)                 | 0.4 (0.3-0.5)                |                      |
| Occupational social class      |              |                         |                              |                      |
| Professional to skilled manual | 173 (39)     | 274 (61)                | 1.0                          | 0.9127               |
| Partially skilled- unskilled   | 572 (39)     | 895 (61)                | 1.0 (0.8-1.2)                |                      |

CI Confidence Interval

LR Likelihood ratio

a Vaccinated 15 or more days before onset of symptoms.

Table S3b Characteristics of unvaccinated and vaccinated subjects (ii)

|                                        | Unvaccinated | Vaccinated <sup>a</sup> | Crude odds ratio | P-value   |
|----------------------------------------|--------------|-------------------------|------------------|-----------|
|                                        | Number (%)   | Number (%)              | (95% CI)         | (LR test) |
|                                        | 745 (39)     | 1,169 (61)              |                  |           |
| Outpatient visits last three months    |              |                         |                  |           |
| None                                   | 204 (48)     | 220 (52)                | 1.0              | <0.0001   |
| One                                    | 164 (41)     | 236 (59)                | 1.3 (1.0-1.8)    |           |
| Two or more                            | 377 (35)     | 713 (65)                | 1.8 (1.4-2.2)    |           |
| Times hospitalized previous 12 months  |              |                         |                  |           |
| None                                   | 500 (40)     | 746 (60)                | 1.0              | 0.2841    |
| One                                    | 162 (38.5)   | 259 (61.5)              | 1.1 (0.9-1.3)    |           |
| Two                                    | 42 (33.3)    | 84 (66.7)               | 1.3 (0.9-2.0)    |           |
| Three or more                          | 41 (33.9)    | 80 (66.1)               | 1.3 (0.9-1.9)    |           |
| Symptom onset to swab (days)           |              |                         |                  |           |
| 1 to 2                                 | 141 (41)     | 207 (59)                | 1.0              | 0.8486    |
| 3 to 4                                 | 261 (39)     | 416 (61)                | 1.1 (0.8-1.4)    |           |
| 5 to 7                                 | 266 (39)     | 414 (61)                | 1.1 (0.8-1.4)    |           |
| >7                                     | 77 (37)      | 132 (63)                | 1.2 (0.8-1.7)    |           |
| Seasonal 2010 recorded                 |              |                         |                  |           |
| No                                     | 628 (79)     | 169 (21)                | 1.0              | <0.0001   |
| Yes                                    | 117 (10)     | 1000 (90)               | 31.8 (24.6-41.0) |           |
| Seasonal 2009 recorded                 |              |                         |                  |           |
| No                                     | 582 (76)     | 188 (24)                | 1.0              | <0.0001   |
| Yes                                    | 163 (14)     | 981 (86)                | 18.6 (14.8-23.5) |           |
| Pandemic 2009 recorded                 |              |                         |                  |           |
| No                                     | 662 (49)     | 679 (51)                | 1.0              | <0.0001   |
| Yes                                    | 83 (14)      | 490 (86)                | 5.8 (4.5-7.4)    |           |
| 23 polysaccharide pneumococcal vaccine |              |                         |                  |           |
| No                                     | 666 (46)     | 793 (54)                | 1.0              | <0.0001   |
| Yes                                    | 79 (18)      | 376 (83)                | 4.0 (3.1-5.2)    |           |
| Length of stay, mean (SD)              | 7.3 (6.1)    | 7.2 (6.0)               |                  | 0.8299    |
| Intensive care unit admission          |              |                         |                  |           |
| No                                     | 726 (97)     | 1,134 (97)              | 1.0              | 0.5680    |
| Yes                                    | 19 (3)       | 35 (3)                  | 1.2 (0.7-2.1)    |           |
| Died during hospital stay              |              |                         |                  |           |
| No                                     | 709 (95)     | 1,093 (93)              | 1.0              |           |
| Yes                                    | 36 (5)       | 76 (7)                  | 1.4 (0.9-2.1)    | 0.1310    |

CI Confidence Interval

LR Likelihood ratio

a Vaccinated 15 or more days before onset of symptoms.
